# Supplementary material
Source: PubMed Central journal article supplement (PMC6468172)
Supplement: CEI-196-237-s001.pdf [file CEI-196-237-s001.pdf]

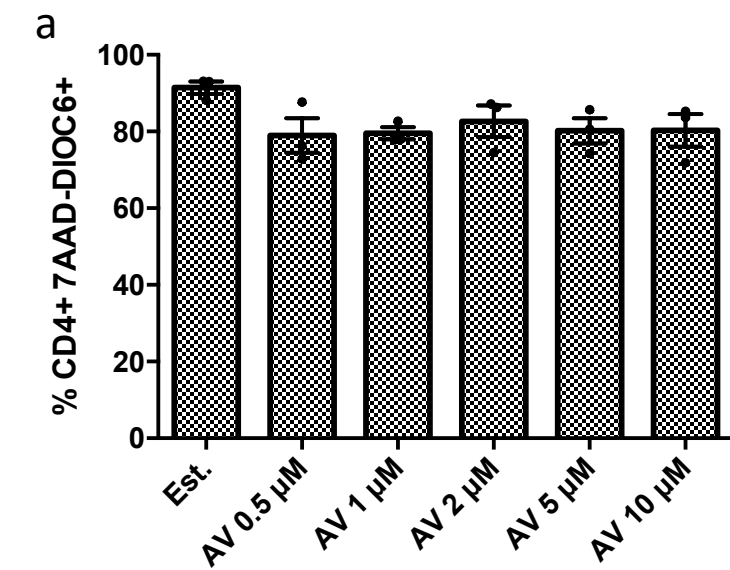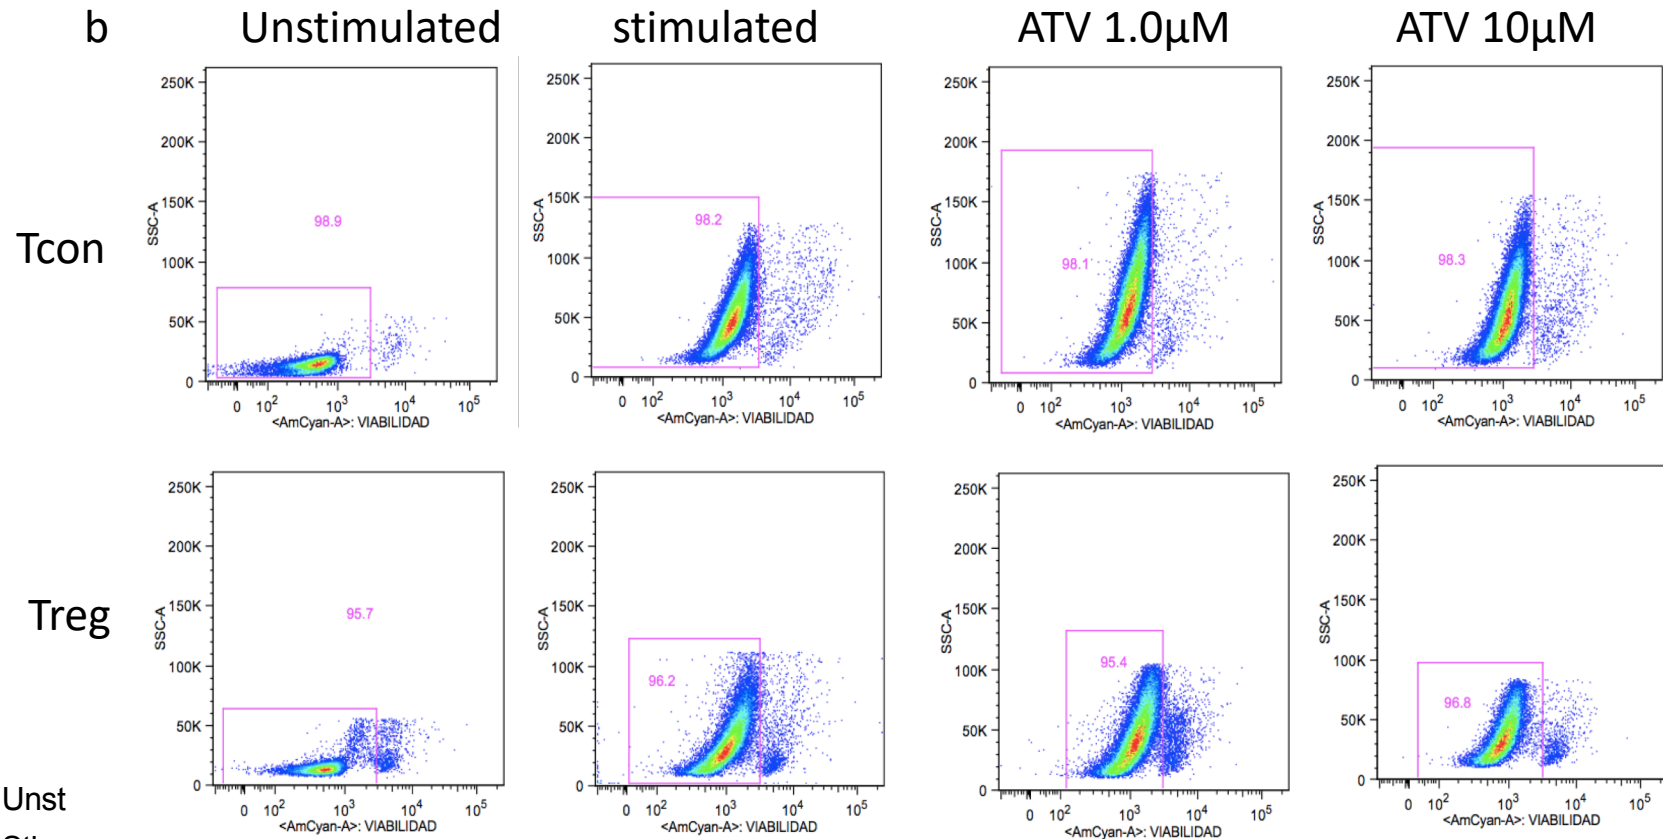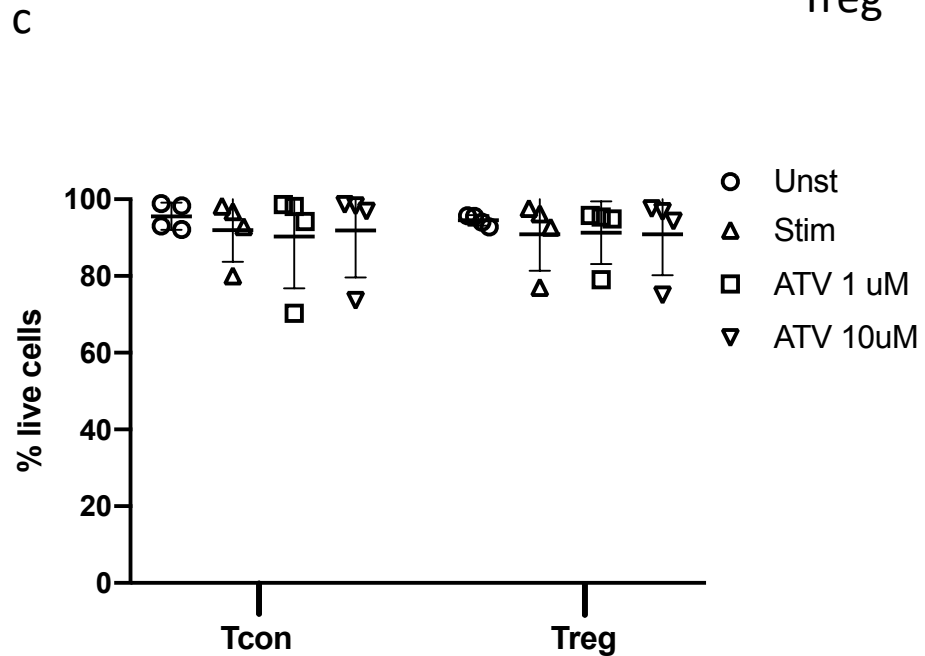

**Supplementary Figure 1.** Untouched total CD4<sup>+</sup> T cells were isolated through magnetic separation from PBMCs of healthy donors and cultured during 48 h under TCR activation as it was mentioned on material and methods. Viable cells were determined as 7-AAD<sup>-</sup> and DIOC-6<sup>+</sup> cells (n=3 donors) (a). Representative flow cytometry plot showing live and dead isolated T cells (Tcon and Treg) by using Live/dead fixable cell stain (b). Percentage analysis of live cells in subsets of T con and Treg (c). No statistical significant differences were found (n=4).

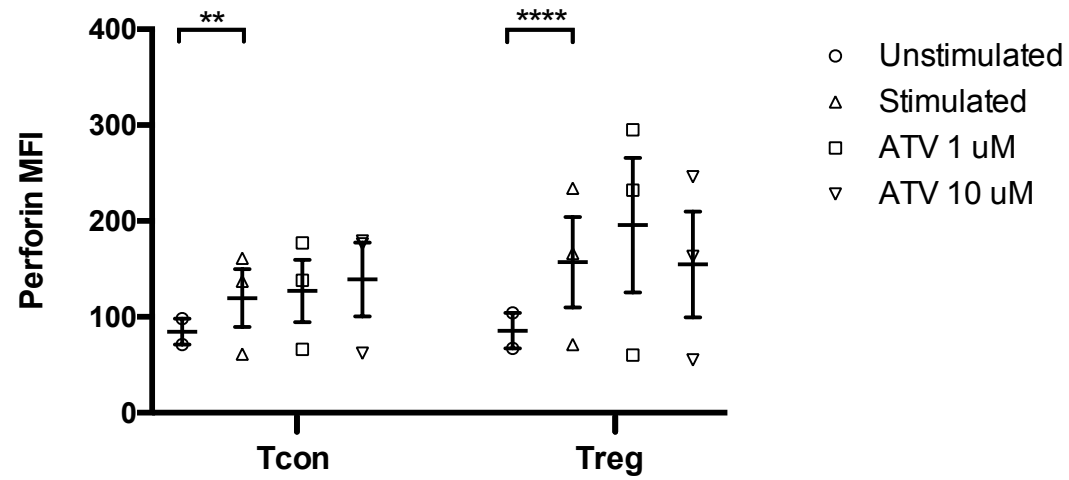

**Supplementary Figure 2.** Mean fluorescence intensity (MFI) analysis of perforin (n=3 donors) on Tcons and Tregs in basal conditions and after activation with anti-CD3, anti-CD28 and IL-2 in the absence or presence of the indicated concentrations of ATV for 48 h. No significant differences were found between groups.

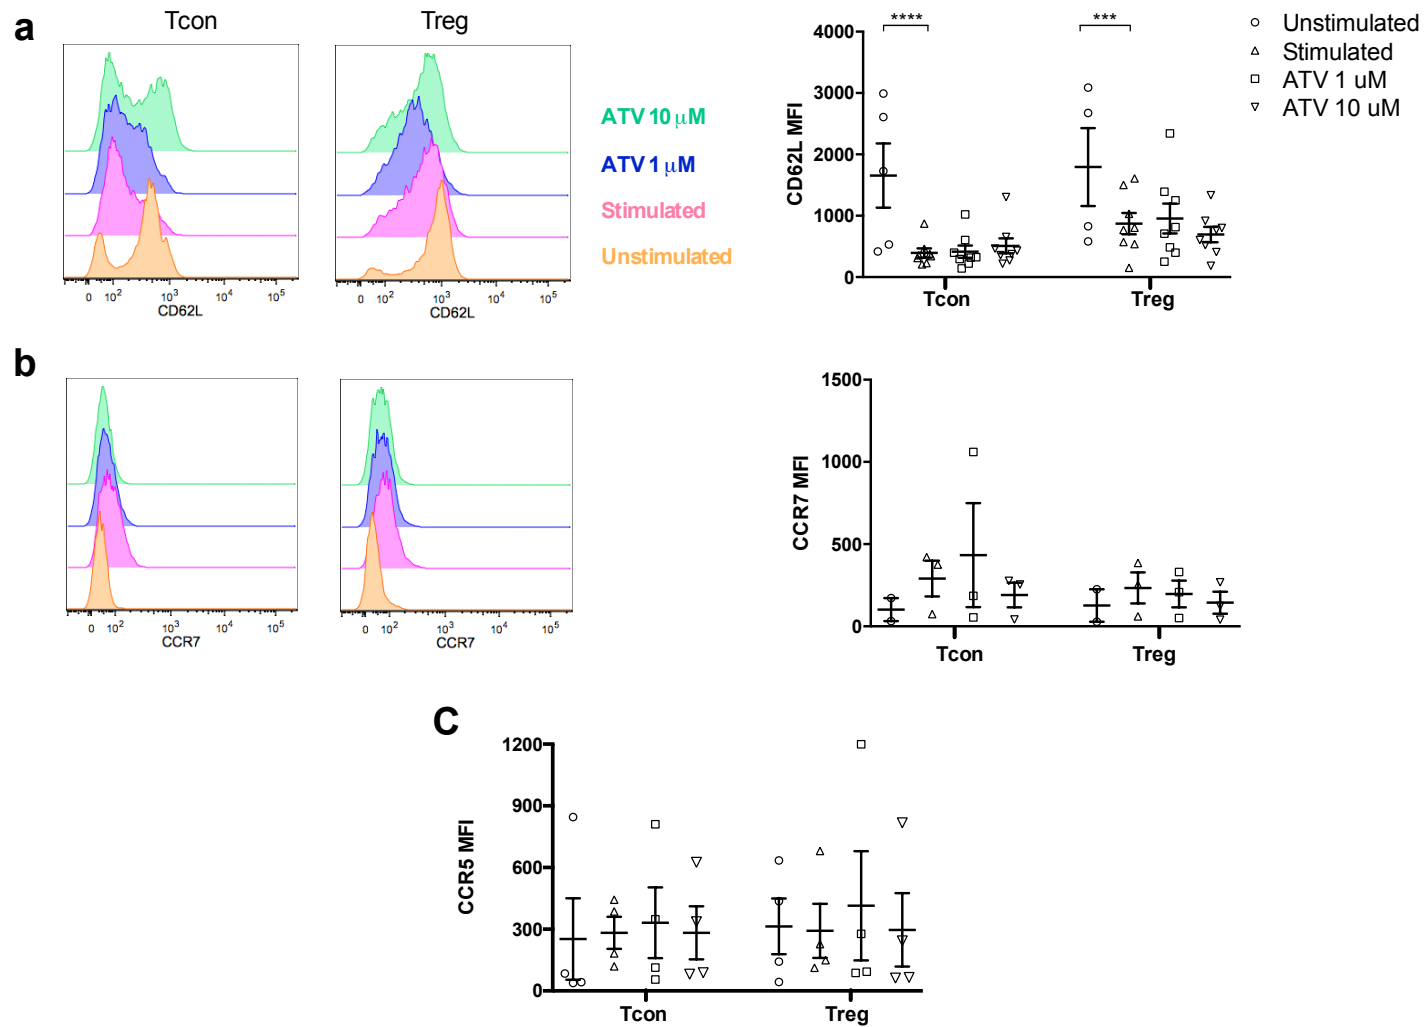

**Supplementary Figure 3.** Representative flow cytometry histogram and MFI analysis of CD62L (n=8 donors) (a), CCR7 molecules (n=3 donors) (b), and CCR5 (n=4 donors) in Tcons and Tregs in basal conditions and after activation with anti-CD3, anti-CD28 and IL-2 in the absence or presence of the indicated concentrations of ATV for 48 h. Statistical analyses were performed using the GLM ANOVA, Dunnett's post-hoc tests. Mean and SEM. \*\*\*\* $p < 0.0001$ , \*\*\* $p < 0.0002$ . Each dot represents one individual in the graph.

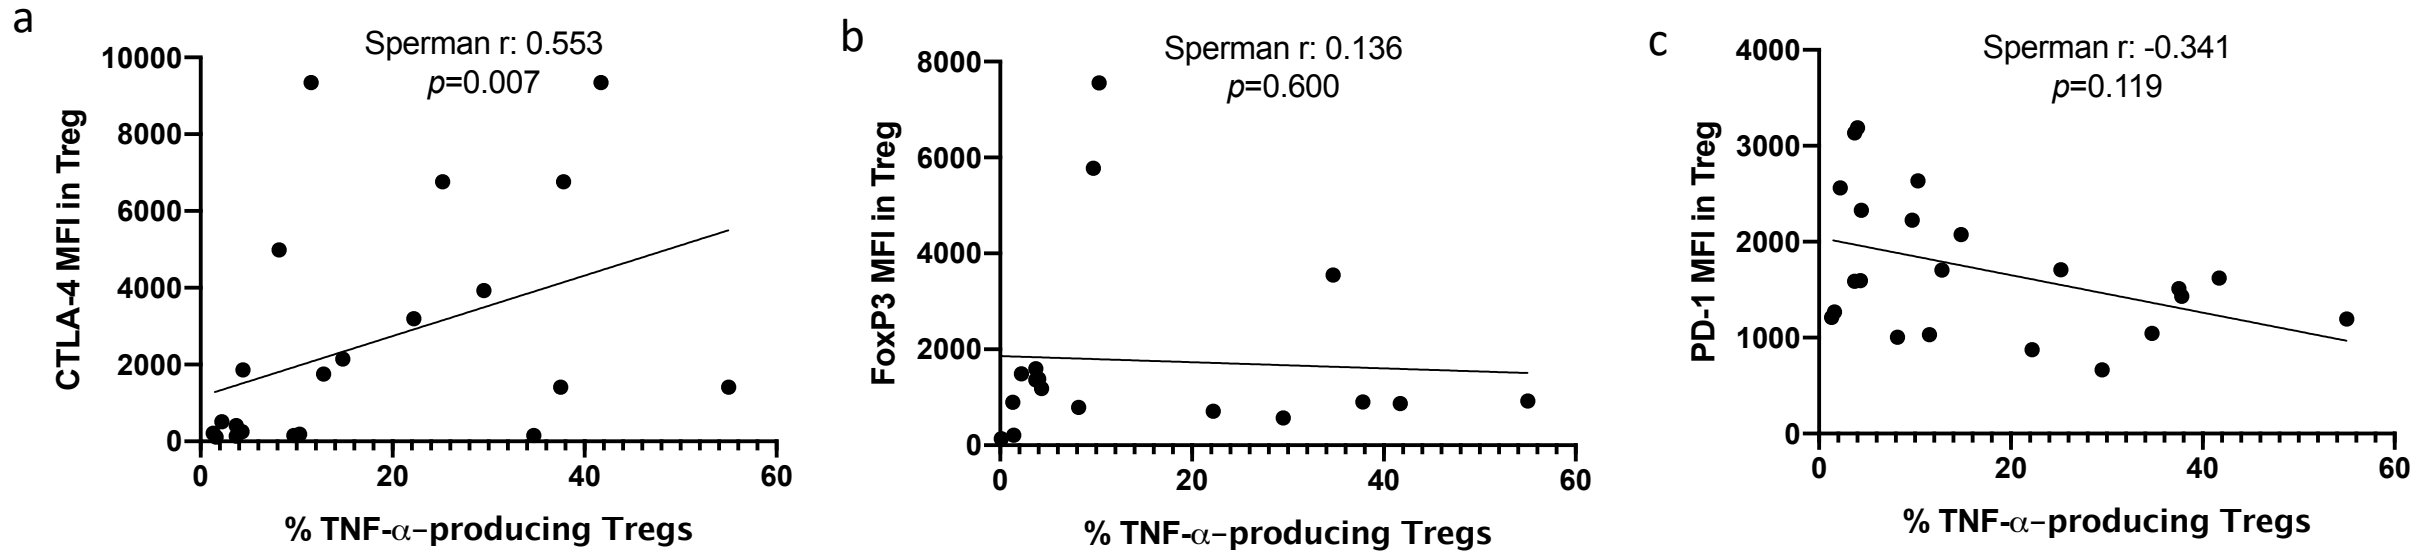

**Supplementary Figure 4.** Correlation of TNF- $\alpha$ -producing Tregs percentage with CTLA-4 MFI (a), FoxP3 MFI (b), and PD1 MFI (c) in Treg cells. Spearman's rank correlation coefficients ( $r$ ) and  $p$  values ( $P$ ) are indicated.

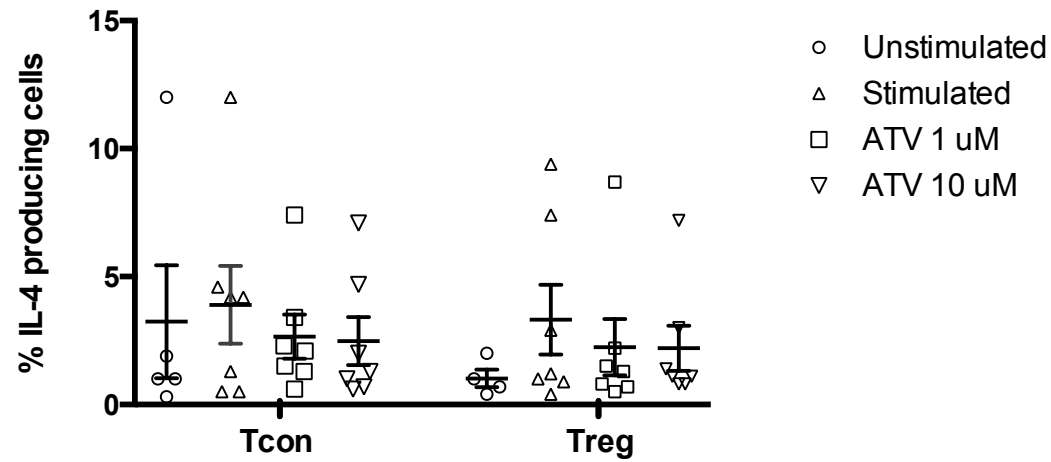

**Supplementary Figure 5.** Tcons and Tregs were isolated by cell sorting and stimulated with anti-CD3, anti-CD28 and IL-2 in the absence or presence of the indicated concentrations of ATV for 48 h. Cells were re-stimulated with PMA/ionomycin in the presence of brefeldin A for 5 h. Then, they were stained with monoclonal antibodies to detect the percentage of cells expressing IL-4 (n=7 donors). No significant differences were found between groups.

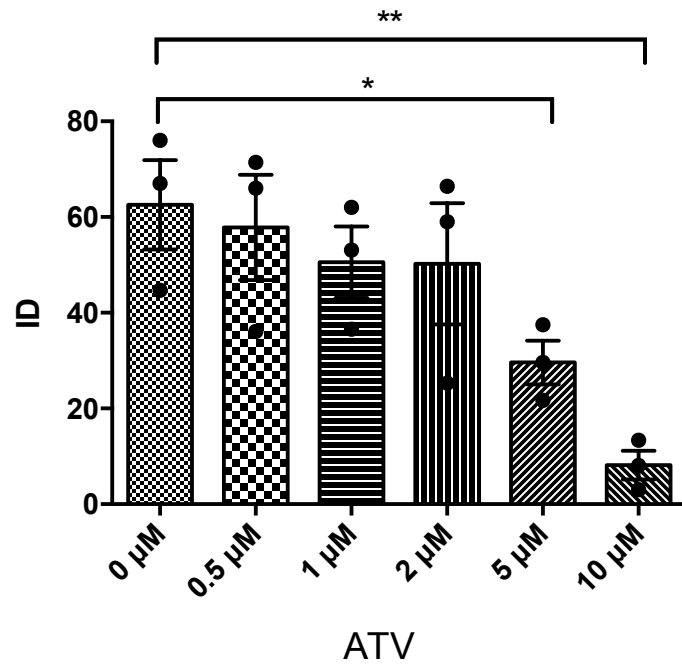

**Supplementary Figure 6.** Untouched total CD4<sup>+</sup> T cells were isolated through magnetic separation from PBMCs of healthy donors and they were labeled with CFSE at 1.25 μM . Cells were washed twice with PBS and put in co-cultured in 96-well round-bottom plates at a ratio 1:1 in the presence of CD3/CD28/IL-2 for 72 hours and different atorvastatin (ATV) concentrations. Proliferation of CD4<sup>+</sup> T cells was detected as the dilution of CFSE on flow cytometry and Index division (ID) was calculated using FlowJo software. (n=3 donors). Statistical analyses were performed using One-Way ANOVA, Dunnett's post hoc test. Mean and SEM. \* $p=0.011$ , \*\* $p=0.001$ .
